# Supplementary material for: MOF/PAN nanofiber-derived N-doped porous carbon materials with excellent electrochemical activity for the simultaneous determination of catechol and hydroquinone
Source: Royal Society of Chemistry journal article supplement (doi:10.1039/c9nj00417c), 2019-01-01
Supplement: c9nj00417c1.pdf [file c9nj00417c1.pdf]

**MOFs/PAN nanofibers-derived N-doped porous carbon materials**  
**with excellent electrochemical activity for simultaneous**  
**determination of catechol and hydroquinone**

Mengxin Zhang<sup>1</sup>, Meishan Li<sup>1</sup>, Wangui Wu<sup>1</sup>, Junkun Chen, Xiuling Ma\*<sup>1</sup>, Zhangjing Zhang<sup>1,2</sup>, and Shengchang Xiang\*<sup>1,2</sup>

<sup>1</sup> Fujian Provincial Key Laboratory of Polymer Materials, College of Chemistry and Materials Science, Fujian Normal University, 32 Shangsan Road, Fuzhou 350007, PR China

<sup>2</sup> State Key Laboratory of Structural Chemistry, Fujian Institute of Research on the Structure of Matter, Chinese Academy of Sciences, Fuzhou, Fujian 350002, PR China

E-mail: scxiang@fjnu.edu.cn; xlma@fjnu.edu.cn

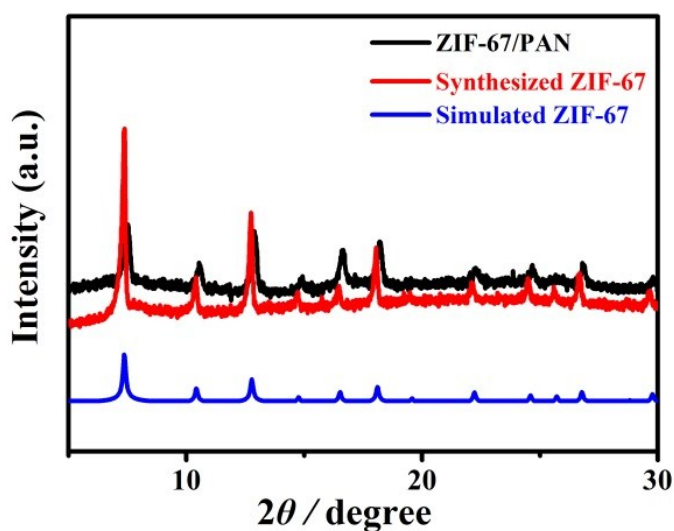

**Figure S1** XRD patterns of ZIF-67 and ZIF-67/PAN

**Table S1** Elemental analysis results of different materials

| Materials        | C(%)  | N(%) | O(%) | Co(%) |
|------------------|-------|------|------|-------|
| C-ZIF-67-800     | 86.75 | 4.96 | 8.07 | 0.22  |
| C-ZIF-67/PAN-700 | 85.28 | 7.91 | 6.62 | 0.19  |
| C-ZIF-67/PAN-800 | 87.09 | 6.33 | 6.37 | 0.21  |
| C-ZIF-67/PAN-900 | 88.37 | 5.86 | 5.56 | 0.21  |

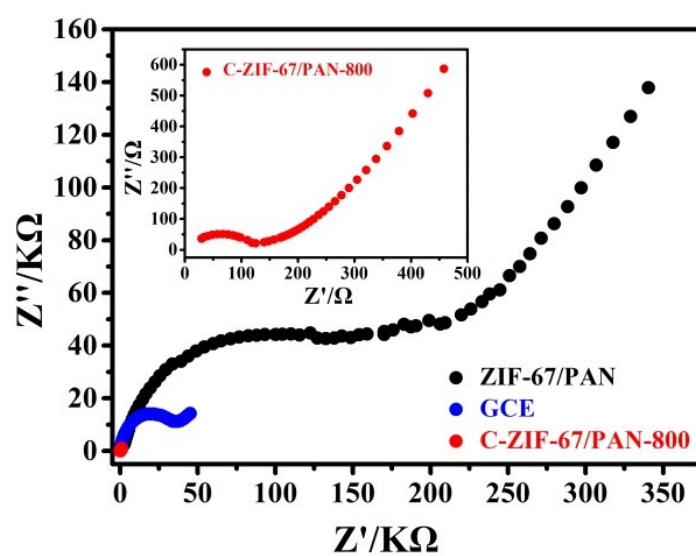

**Figure S2** The EIS spectras of bare GCE, ZIF-67/PAN /GCE and C-ZIF-67/PAN-800/GCE

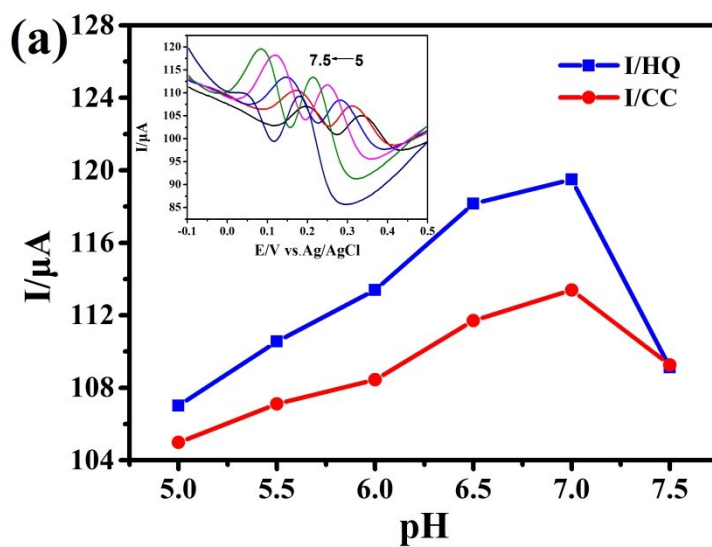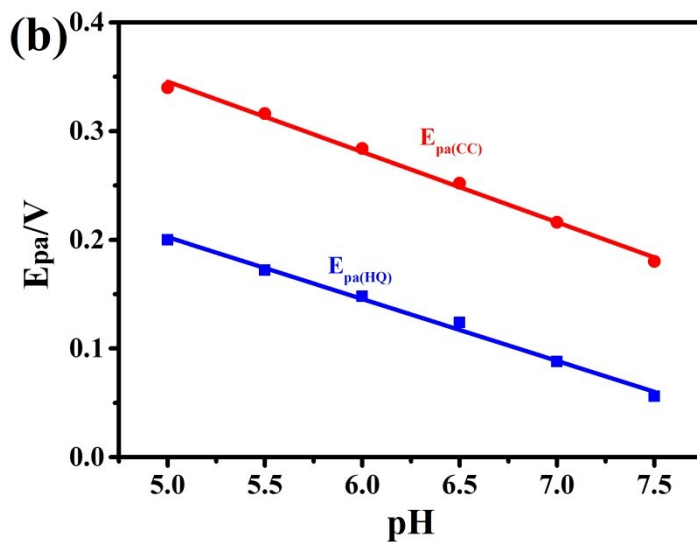

**Figure S3** The effect of pH on the oxidation peak current (a) ( Insert is the DPV curve) and oxidation peak potential (b) of HQ and CC in 0.1 mol/L PBS (pH 7.0)

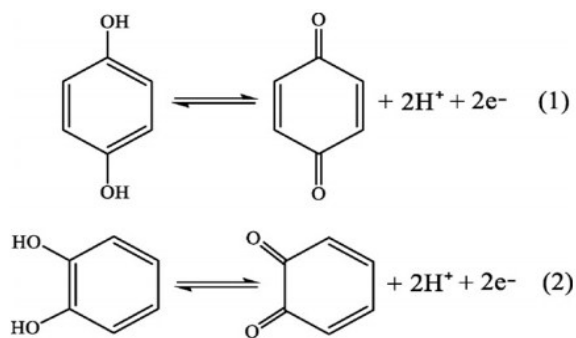

**Figure S4** The redox mechanism of HQ and CC with equivalent protons and equivalent electrons.

**Table S2** Comparison for the simultaneous determination of HQ and CC at different modified electrodes

| Modified materials                         | Linear range<br>( $\mu\text{mol L}^{-1}$ ) |          | Detection limit<br>( $\mu\text{mol L}^{-1}$ ) |       | Reference |
|--------------------------------------------|--------------------------------------------|----------|-----------------------------------------------|-------|-----------|
|                                            | HQ                                         | CT       | HQ                                            | CT    |           |
| TiO <sub>2</sub> /C <sub>900</sub>         | 5-300                                      | 5-300    | 1.24                                          | 2.05  | [1]       |
| 3DIPC                                      | 0.06-30                                    | 0.1-40   | 0.021                                         | 0.037 | [2]       |
| N,S-AGR                                    | 0.1-10                                     | 1-10     | 0.03                                          | 0.15  | [3]       |
| PE-CNT                                     | 5-300                                      | 5-300    | 1.5                                           | 0.7   | [4]       |
| CS/MWCNTs/PDA/AuNPs                        | 0.1–10                                     | 0.1–10   | 0.035                                         | 0.047 | [5]       |
| PEDOT/NGE                                  | 1-10                                       | 1-10     | 0.18                                          | 0.26  | [6]       |
| PB-SPCE                                    | 4–90                                       | 4–90     | 0.117                                         | 0.428 | [7]       |
| CMWNTs–                                    | 10-120                                     | 5-80     | 2.3                                           | 1.0   | [8]       |
| MOF-derived carbon                         | 1-200                                      | 1-300    | 0.215                                         | 0.278 | [9]       |
| Nano-Beta/CPE                              | 0.15-400                                   | 0.15-400 | 0.1                                           | 0.13  | [10]      |
| ZnO-Al <sub>2</sub> O <sub>3</sub> / AuNPs | 0.13-1/1.5-56.6                            | 0.5-40   | 0.19/15.0                                     | 3.1   | [11]      |
| C-ZIF-67/PAN-800/GCE                       | 1- 120                                     | 1-200    | 1                                             | 1     | This work |

**Table S3** Determination of CC and HQ in water samples (mean $\pm$ SD, n=3)

| Added( $\mu\text{M/L}$ ) | Found( $\mu\text{M/L}$ ) |                  | RSD(%) |      | Recovery |        |
|--------------------------|--------------------------|------------------|--------|------|----------|--------|
|                          | HQ                       | CC               | HQ     | CC   | HQ       | CC     |
| 0                        | ND                       | ND               | —      | —    | —        | —      |
| 10                       | 9.79 $\pm$ 0.34          | 9.96 $\pm$ 0.35  | 3.47   | 3.51 | 97.9     | 99.6   |
| 20                       | 19.88 $\pm$ 0.63         | 19.95 $\pm$ 0.67 | 3.16   | 3.36 | 99.4     | 99.78  |
| 50                       | 50.13 $\pm$ 1.6          | 50.06 $\pm$ 1.72 | 3.22   | 3.43 | 100.26   | 100.12 |

SD: standard deviation; ND: not detected; RSD: relative standard deviation;

## References

- 1 Z. Y. Wang, M. S. Li, Y. X. Ye, Y. S. Yang, Y. Q. Lu, X. L. Ma, Z. J. Zhang, S. C. Xiang, *J Solid State Electrochem.*, 2019, **23**, 81–89.
- 2 Y. H. Xiang, L. Li, H. Liu, Z. Shi, Y. B. Tan, C. Y. Wu, Y. X. Liu, J. S. Wang and S. H. Zhang, *Sensor Actuat B-Chem.*, 2018, **267**, 302-311.
- 3 L. L. Xiao, J. Yin, Y. C. Li, Q. H. Yuan, H. J. Shen, G. Z. Hu and W. Gan, *Analyst.*, 2016, **141**,5555-5562.
- 4 A. J. S. Ahammad, T. Akter, A. A. Mamun, T. Islam, M. M. Hasan, M. A. Mamun, S. Faraezi, F. Z. Monira and J. K. Saha, *J Electrochem Soc.*, 2018,**165**, B390-B397.
- 5 Y. Wang, Y. Y. Xiong, J. Y. Qu, J. H. Qu and S. F. Li, *Sensor Actuat B-Chem.*, 2016,**223**, 501-508.
- 6 W. M. Si, W. Lei, Z. Han, Q. L. Hao, Y. H. Zhang and M. Z. Xia, *Sensors and Actuators B: Chemical.*, 2014, **199**,154-160.
- 7 M. Buleandra, A. A. Rabinca, C. Mihailciuc, A. Balan, C. Nichita, I. Stamatina and A. A. Ciucu, *Sensor Actuat B-Chem.*, 2014, **203**, 817-824.
- 8 S. Q. Feng, Y. Y. Zhang, Y. M. Zhong, Y. C. Li and S. X. Li, *J Electroanal Chem.*, 2014, **733**,1-5.
- 9 J. Y. Xu, J. F. Xia, F. F. Zhang and Z. H. Wang, *Electrochim Acta.*, 2017, **251**, 71-80.
- 10 B. Kaur and R. Srivastava, *Electroanal.*, 2014, **26**, 1739-1750.
- 11 M. Nazari, S. Kashanian, P. Moradipour and N. Maleki, *J Electroanal Chem.*, 2018, **812**, 122-131.
